# Supplementary material for: One-pot synthesis of substituted benzene via intermolecular [2+2+2] cycloaddition catalyzed by air-stable Ru(ii)-complex
Source: Royal Society of Chemistry journal article supplement (doi:10.1039/c0dt01502d), 2011-01-01
Supplement: c0dt01502d.pdf [file c0dt01502d.pdf]

**One-Pot Synthesis of Substituted Benzene via  
Intermolecular [2+2+2] Cycloaddition Catalyzed by  
Air Stable Ru(II)-Complex**

*Chung-Yeh Wu, Ying-Chih Lin,<sup>\*</sup> Pi-Tai Chou, Yu Wang, Yi-Hung Liu*

Department of Chemistry, National Taiwan University  
Taipei, 106 (Taiwan)  
Fax: (+886) 223636359  
E-mail: [yclin@ntu.edu.tw](mailto:yclin@ntu.edu.tw)

**Table S1.** Crystal Data and Collection and Refinement Parameters.

|                                                                                      | <b>4ga</b>                                     | <b>4gs</b>                                     | <b>6p</b>                                                         | <b>7</b>                                                      |
|--------------------------------------------------------------------------------------|------------------------------------------------|------------------------------------------------|-------------------------------------------------------------------|---------------------------------------------------------------|
| formula                                                                              | C <sub>34</sub> H <sub>26</sub> O <sub>8</sub> | C <sub>34</sub> H <sub>26</sub> O <sub>8</sub> | C <sub>69</sub> H <sub>61</sub> Cl <sub>4</sub> O <sub>24.5</sub> | C <sub>22</sub> H <sub>16</sub> O <sub>8</sub> S <sub>2</sub> |
| formula weight                                                                       | 562.55                                         | 562.55                                         | 1423.98                                                           | 472.47                                                        |
| crystal system                                                                       | Monoclinic                                     | Monoclinic                                     | Triclinic                                                         | Monoclinic                                                    |
| Space group                                                                          | <i>P</i> 2 <sub>1</sub> / <i>n</i>             | <i>P</i> 2 <sub>1</sub> / <i>n</i>             | <i>P</i> $\bar{1}$                                                | <i>P</i> 2 <sub>1</sub> / <i>c</i>                            |
| a(Å)                                                                                 | 8.79121(1)                                     | 11.9034(6)                                     | 12.0972(3)                                                        | 9.0718(3)                                                     |
| b(Å)                                                                                 | 13.56521(1)                                    | 11.1168(5)                                     | 14.9120(4)                                                        | 19.0514(9)                                                    |
| c(Å)                                                                                 | 24.5222(2)                                     | 21.4260(9)                                     | 20.7722(6)                                                        | 11.6545(4)                                                    |
| $\alpha$ (deg)                                                                       | 90°                                            | 90°                                            | 72.261(2)°                                                        | 90°                                                           |
| $\beta$ (deg)                                                                        | 98.6201(1)°                                    | 97.873(4)°                                     | 77.370(2)°                                                        | 91.567(4)°                                                    |
| $\gamma$ (deg)                                                                       | 90°                                            | 90°                                            | 89.011(2)°                                                        | 90°                                                           |
| <i>V</i> (Å <sup>3</sup> )                                                           | 2891.35(5)                                     | 2808.5(2)                                      | 3477.73(16)                                                       | 2013.50(14)                                                   |
| Z                                                                                    | 4                                              | 4                                              | 2                                                                 | 4                                                             |
| reflns collected                                                                     | 23056                                          | 12030                                          | 28484                                                             | 11482                                                         |
| Indep reflns ( <i>R</i> <sub>int</sub> )                                             | 5278(0.0174)                                   | 5030(0.0578)                                   | 12637(0.0331)                                                     | 3633(0.0524)                                                  |
| Goodness-of-fit on F <sup>2</sup>                                                    | 1.454                                          | 1.779                                          | 1.555                                                             | 1.434                                                         |
| <i>R</i> <sub>1</sub> / <i>wR</i> <sub>2</sub> [ <i>I</i> > 2 $\sigma$ ( <i>I</i> )] | 0.0405/0.1572                                  | 0.1341/0.3213                                  | 0.0739/0.2115                                                     | 0.0668/0.1909                                                 |
| <i>R</i> <sub>1</sub> / <i>wR</i> <sub>2</sub> (all data)                            | 0.0441/0.1623                                  | 0.2295/0.3622                                  | 0.0939/0.2212                                                     | 0.0882/0.2088                                                 |

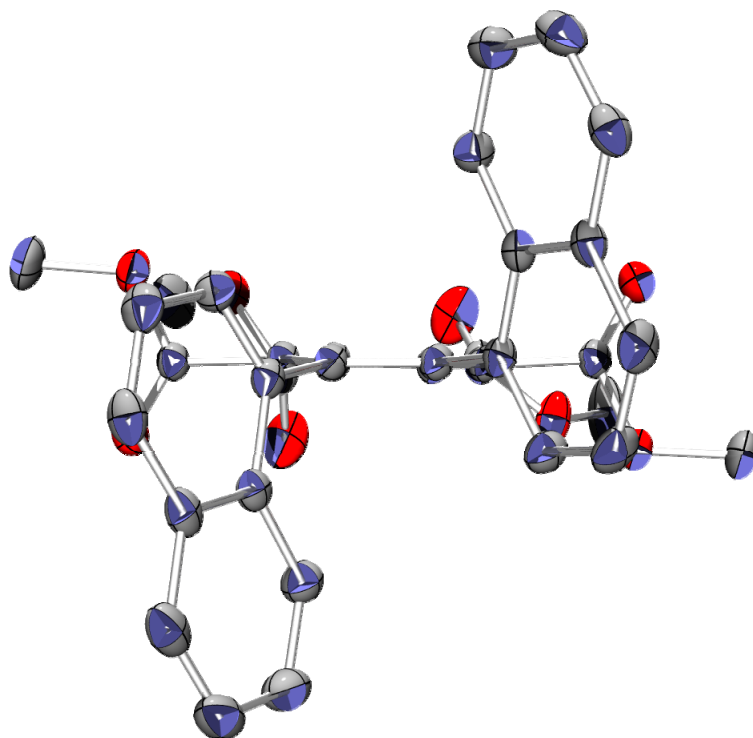

Figure S1. X-ray crystal structure of **4ga** with hydrogen atoms are omitted for clarity.  
(thermal ellipsoids are set at 30% probability level)

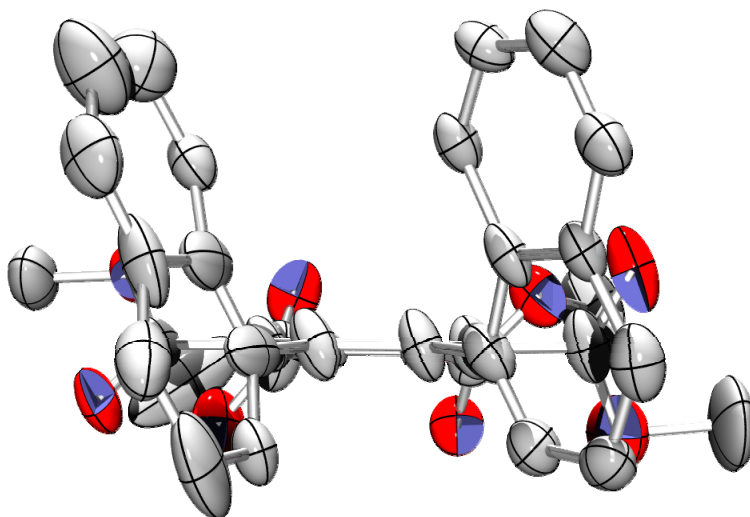

Figure S2. X-ray crystal structure of **4gs** with hydrogen atoms are omitted for clarity.  
(thermal ellipsoids are set at 30% probability level)

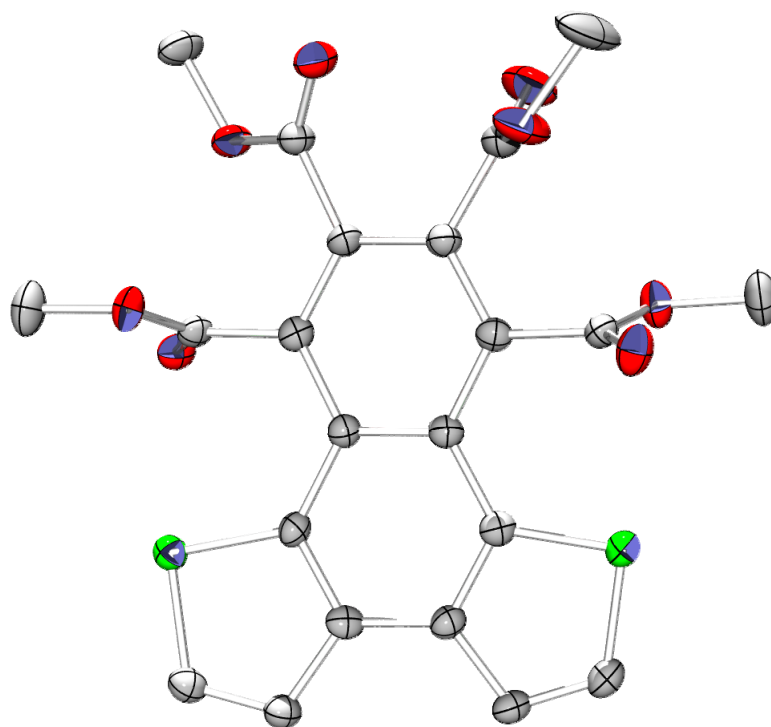

Figure S3. X-ray crystal structure of 7 with hydrogen atoms are omitted for clarity.  
(thermal ellipsoids are set at 30% probability level)
